# Supplementary material for: Deep sequence analysis of HIV adaptation following vertical transmission reveals the impact of immune pressure on the evolution of HIV
Source: PLoS Pathog. 2019 Dec 10;15(12):e1008177. doi: 10.1371/journal.ppat.1008177 (PMC6924686; doi:10.1371/journal.ppat.1008177)
Supplement: S6 Table — (XLSX) [file ppat.1008177.s006.xlsx]

## Sheet: Sheet2
	Table S7. PCR cycling conditions for next-generation sequencing and qPCR.
	RT-PCR				RT-qPCR				1st rd PID PCR
		Temperature	Time			Temperature	Time			Temperature	Time
	1x	55°C	30min		1x	42°C	30min		20x	98°C	10s
		94°C	2min			95°C	10min			68°C	1min
	40x	94°C	15s		40x	95°C	15s			15°C	Infinity
		60°C	30s			60°C	1min
		68°C	x min			plate read			2nd rd PID PCR
	1x	68°C	5min		1x	22°C	30s			Temperature	Time
		15°C	Infinity			15°C	Infinity		30x	98°C	10s
										68°C	1min
	PCR <2kb				qPCR					15°C	Infinity
		Temperature	Time			Temperature	Time
	1x	95°C	2min		1x	95°C	10min
	35x	95°C	20s		40x	95°C	15s
		60°C	20s			60°C	1min
		72°C	x min			plate read
		15°C	Infinity		1x	22°C	30s
						15°C	Infinity
	PCR >2kb
		Temperature	Time
	1x	94°C	1min
		60°C	20s
		72°C	2min
	14x	94°C	15s
		60°C	20s
		68°C	x min
	20x	94°C	15s
		65°C	20s
		68°C	x min
		15°C	Infinity
	x = size (kb) of the expected amplicon, e.g. 2kb amplicon = 2 minutes
